# Supplementary material for: Effects of zinc and manganese ions in aqueous electrolytes on structure and electrochemical performance of Na0.44MnO2 cathode material
Source: Royal Society of Chemistry journal article supplement (doi:10.1039/c6ra01768a), 2016-01-01
Supplement: c6ra01768a1.pdf [file c6ra01768a1.pdf]

Electronic Supporting Information for

## Effects of zinc and manganese ions in aqueous electrolytes on structure and electrochemical performance of $\text{Na}_{0.44}\text{MnO}_2$ cathode material

Shouli Bai,<sup>a</sup> Jingli Song,<sup>a,b</sup> Yuehua Wen,<sup>\*b</sup> Jie Cheng,<sup>b</sup> Gaoping Cao,<sup>b</sup> Yusheng Yang<sup>a,b</sup> and Dianqing Li <sup>\*a</sup>

<sup>a</sup> State Key Laboratory of Chemical Resource Engineering, Beijing Key Laboratory of Environmentally Harmful Chemicals Analysis, Beijing University of Chemical Technology, Beijing, China, 100029

<sup>b</sup> Research Institute of Chemical Defence, Beijing, China, 100191

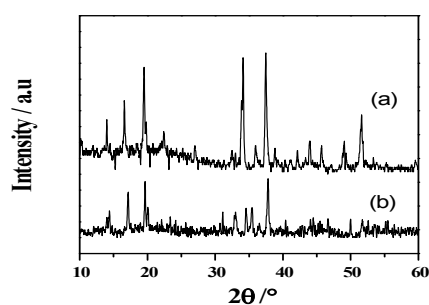

**Figure S1** XRD patterns of the  $\text{Na}_{0.44}\text{MnO}_2$  electrode at the original state (a) and at the discharge state after 20 cycles (b) at the current density of 100mA/g in 1 M  $\text{Na}_2\text{SO}_4$  + 0.5M  $\text{ZnSO}_4$  mixed aqueous electrolytes.

The XRD pattern of the  $\text{Na}_{0.44}\text{MnO}_2$  electrode after 20 cycles at the current density of 100mA/g in 1 M  $\text{Na}_2\text{SO}_4$  + 0.5M  $\text{ZnSO}_4$  mixed aqueous electrolytes was shown in the Figure S1. As can be seen, some characteristic diffraction peaks of  $\text{Na}_{0.44}\text{MnO}_2$  are evidently weakened, indicative of a great change in the crystal structure of  $\text{Na}_{0.44}\text{MnO}_2$ .
